# Supplementary material for: The psychological impact of cardiovascular screening: the athlete's perspective
Source: HighWire-hosted journal article supplement (doi:10.1136/bjsports-2014-093500), 2014-05-13
Supplement: bjsports-2014-093500supp_Post-Screen-TP.pdf [file bjsports-2014-093500supp_Post-Screen-TP.pdf]

## Heart Screening Questionnaire: Post-Screen TP Result

Additional testing was performed due to:     **History**    **Exam**    **ECG**

| <b>Directions:</b> For the following questions, please <input checked="" type="checkbox"/> the box that <b>best</b> describes your opinion. | <b>Strongly Disagree</b> | <b>Disagree</b>          | <b>Neither Agree nor Disagree</b> | <b>Agree</b>             | <b>Strongly Agree</b>    |
|---------------------------------------------------------------------------------------------------------------------------------------------|--------------------------|--------------------------|-----------------------------------|--------------------------|--------------------------|
| 1. The time period for receiving my results was appropriate.                                                                                | <input type="checkbox"/> | <input type="checkbox"/> | <input type="checkbox"/>          | <input type="checkbox"/> | <input type="checkbox"/> |
| 2. I was satisfied with this heart screen.                                                                                                  | <input type="checkbox"/> | <input type="checkbox"/> | <input type="checkbox"/>          | <input type="checkbox"/> | <input type="checkbox"/> |
| 3. While undergoing the heart screen, I felt anxious.                                                                                       | <input type="checkbox"/> | <input type="checkbox"/> | <input type="checkbox"/>          | <input type="checkbox"/> | <input type="checkbox"/> |
| 4. I felt anxious or stressed while getting additional testing on my heart                                                                  | <input type="checkbox"/> | <input type="checkbox"/> | <input type="checkbox"/>          | <input type="checkbox"/> | <input type="checkbox"/> |
| 5. Immediately after I received my final results, I felt anxious                                                                            | <input type="checkbox"/> | <input type="checkbox"/> | <input type="checkbox"/>          | <input type="checkbox"/> | <input type="checkbox"/> |
| 6. I was scared that the heart screen would reveal that I had an abnormal heart.                                                            | <input type="checkbox"/> | <input type="checkbox"/> | <input type="checkbox"/>          | <input type="checkbox"/> | <input type="checkbox"/> |
| 7. Even though I needed additional testing, I am glad I had this heart screen.                                                              | <input type="checkbox"/> | <input type="checkbox"/> | <input type="checkbox"/>          | <input type="checkbox"/> | <input type="checkbox"/> |
| 8. Compared to other heart screens that I have had, I feel safer playing sports.                                                            | <input type="checkbox"/> | <input type="checkbox"/> | <input type="checkbox"/>          | <input type="checkbox"/> | <input type="checkbox"/> |
| 9. I feel that all athletes should receive a screen like this before playing sports.                                                        | <input type="checkbox"/> | <input type="checkbox"/> | <input type="checkbox"/>          | <input type="checkbox"/> | <input type="checkbox"/> |
| 10. I would recommend this heart screen to other athletes.                                                                                  | <input type="checkbox"/> | <input type="checkbox"/> | <input type="checkbox"/>          | <input type="checkbox"/> | <input type="checkbox"/> |
| 11. Even though I was found to have a heart condition, I am glad I had this heart screen.                                                   | <input type="checkbox"/> | <input type="checkbox"/> | <input type="checkbox"/>          | <input type="checkbox"/> | <input type="checkbox"/> |

12. I was told that I would be able to play my sport in the future.

Yes             No

**After all testing, my final diagnosis was** \_\_\_\_\_

**Thank you for your time!**
